# Supplementary material
Source: PubMed Central journal article supplement (PMC6195120)

Supplementary Figure 2

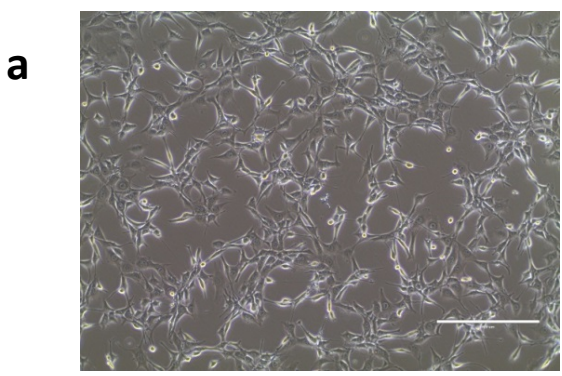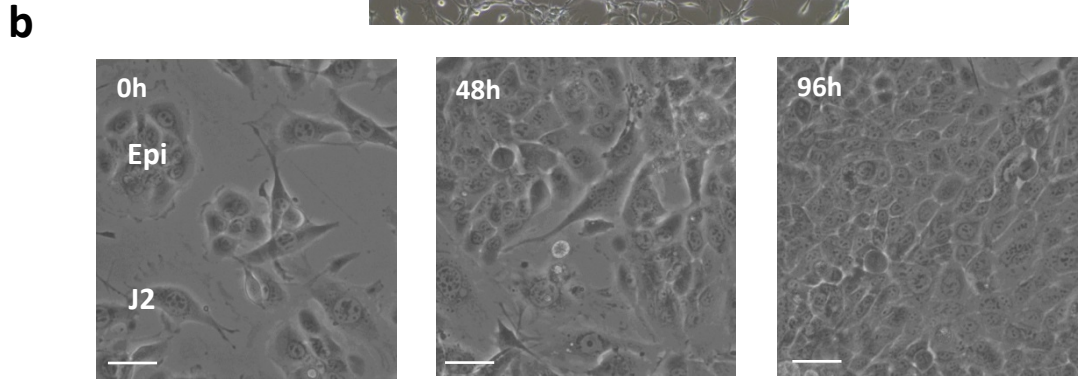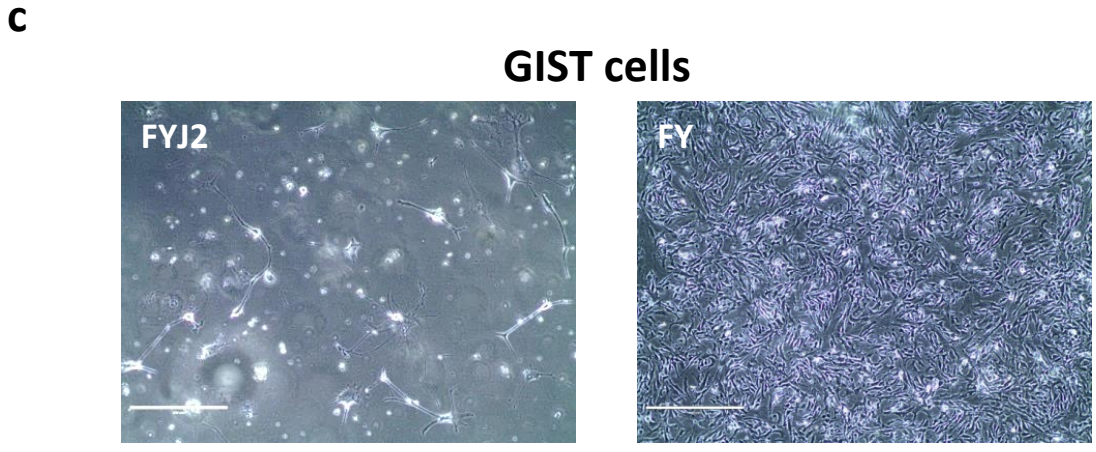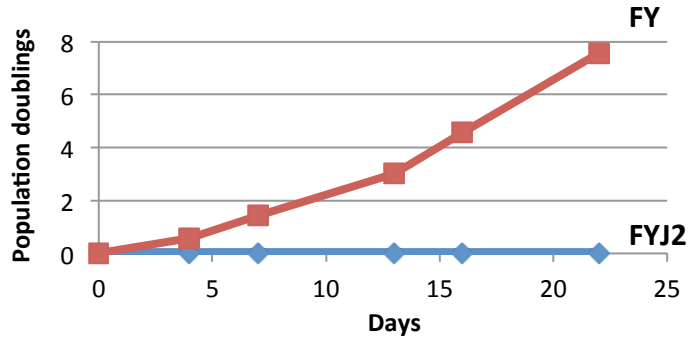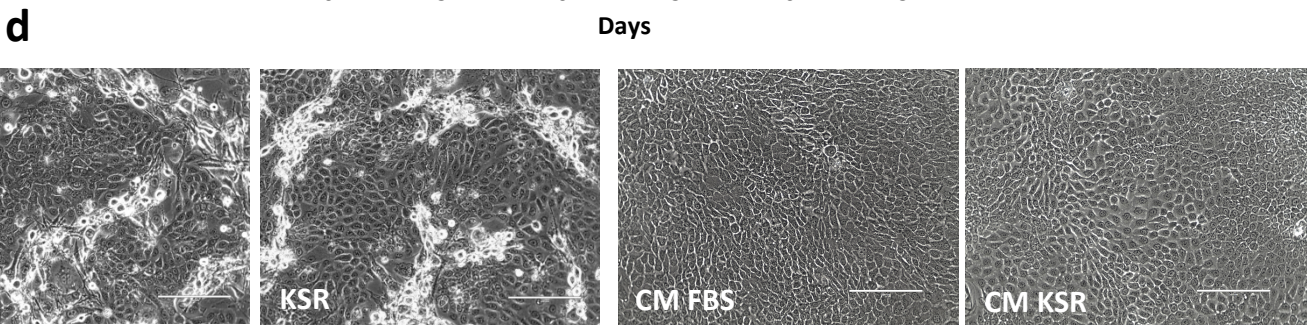

Supplement: NIHMS987692-supplement-supplemental_figure_2.pdf [file NIHMS987692-supplement-supplemental_figure_2.pdf]
